# Supplementary material for: Analytical determination of gold ions based on ranelate induced nanoparticle formation
Source: Royal Society of Chemistry journal article supplement (doi:10.1039/d2ay00411a), 2022-01-01
Supplement: d2ay00411a1.pdf [file d2ay00411a1.pdf]

## Supplementary Information

### ***Analytical determination of gold ions based on ranelate induced nanoparticles formation***

João Victor Mattioni,<sup>a</sup> Douglas Santana Franciscato,<sup>a</sup> Luca Michael Sihna<sup>a</sup> and Henrique Eisi Toma<sup>a,b</sup>

a. Institute of Chemistry, University of São Paulo – Avenida Professor Lineu Prestes, 748, 05508-000, São Paulo (SP), Brazil

b. Correspondence should be addressed to: [henetoma@iq.usp.br](mailto:henetoma@iq.usp.br)

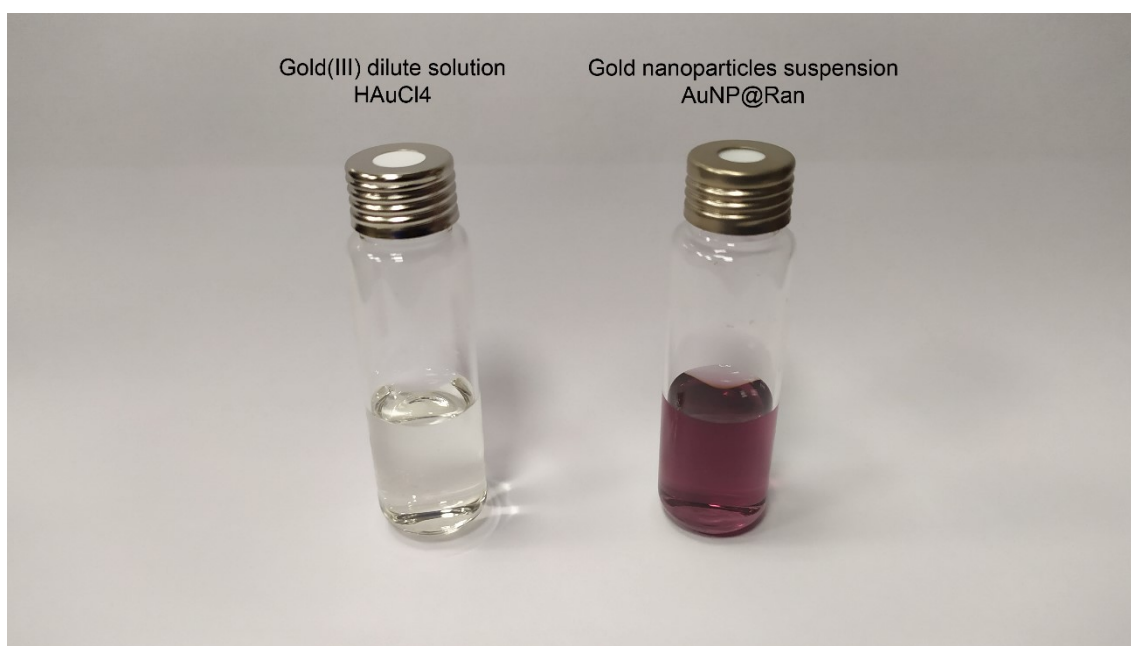

**Figure S1.** Gold(III) dilute solution in the form of H<sub>AuCl</sub><sub>4</sub> (left) and standard ranelate-stabilized gold nanoparticles purplish suspension (right).

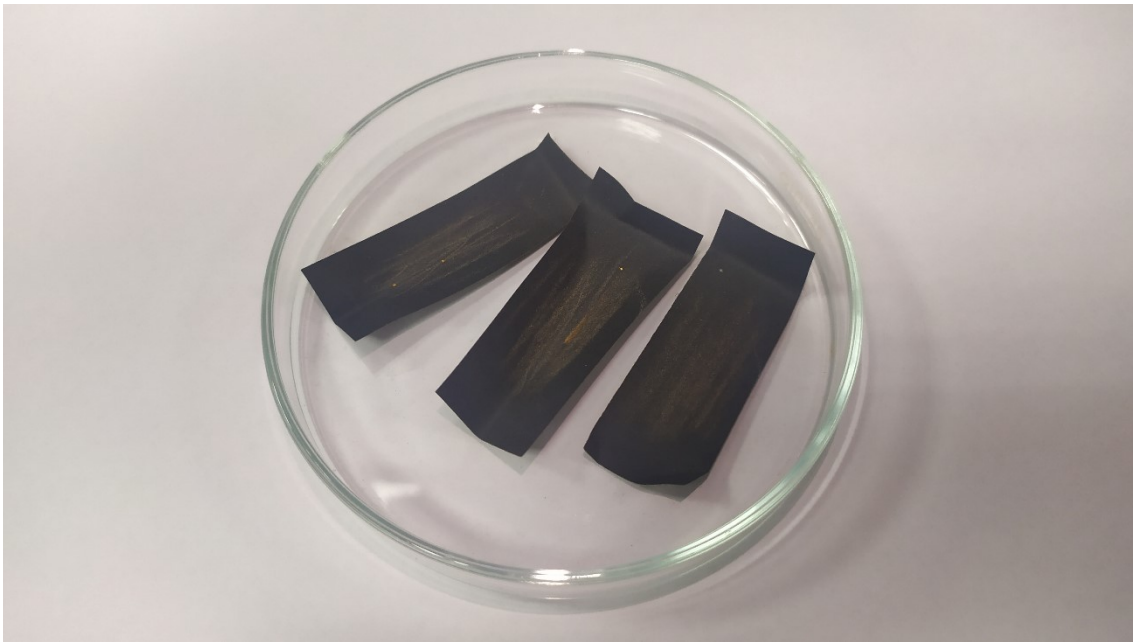

**Figure S2.** Real samples of sandpaper after polishing metallic gold, with gold powders on them.

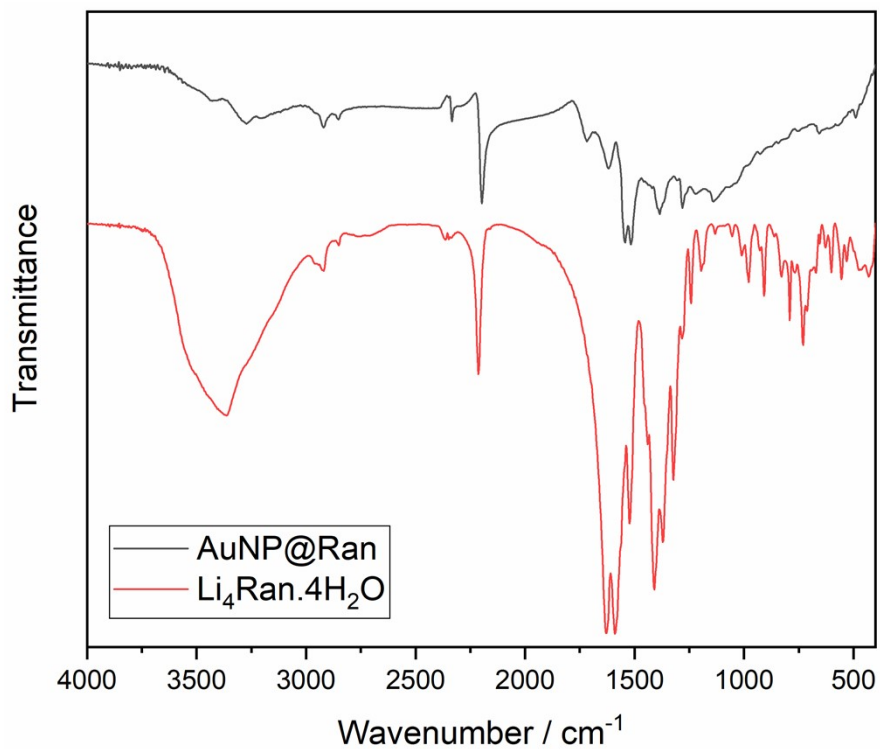

**Figure S3.** Infrared (FT-IR) spectra of ranelate-stabilized gold nanoparticles ( $\text{AuNP@Ran}$ ) and lithium ranelate precursor ( $\text{Li}_4\text{Ran}\cdot 4\text{H}_2\text{O}$ ) in KBr pellets. Acquisition of 24 scans with a resolution of  $4 \text{ cm}^{-1}$  from  $4000$  to  $400 \text{ cm}^{-1}$ , on an Alpha Bruker spectrometer.
